# Supplementary material
Source: publisher site journal article supplement (https://www.spandidos-publications.com/7286/downloadSupplementary)
Supplement: Supplementary file 1 [file downloadSupplementary]

Table SI. Characteristics of the patient and healthy controls.

| Patient and controls | Age | Sex  | Radiation Source | Duration of radiation | Times of blood collection      |
|----------------------|-----|------|------------------|-----------------------|--------------------------------|
| Irradiated patient   | 30  | male | Ir-192           | 30 sec                | Day 114 (1st)<br>Day 631 (2nd) |
| Control 1            | 30  | male | No               | No                    |                                |
| Control 2            | 31  | male | No               | No                    |                                |
| Control 3            | 31  | male | No               | No                    |                                |
| Control 4            | 29  | male | No               | No                    |                                |
| Control 5            | 29  | male | No               | No                    |                                |
| Control 6            | 30  | male | No               | No                    |                                |
| Control 7            | 30  | male | No               | No                    |                                |
| Control 8            | 31  | male | No               | No                    |                                |
| Control 9            | 31  | male | No               | No                    |                                |
| Control 10           | 32  | male | No               | No                    |                                |

Table SII. Blood routine examination at Stage 1.

| Blood test                                | Results | Unit               | Mark | Normal range |
|-------------------------------------------|---------|--------------------|------|--------------|
| White blood cell count                    | 3.9     | $\times 10^9/l$    |      | 3.50-9.50    |
| Red blood cell count                      | 4.22    | $\times 10^{12}/l$ |      | 4.30-5.80    |
| Hemoglobin                                | 134.00  | g/l                |      | ~130.00      |
| Platelet count,                           | 152.00  | $\times 10^9/l$    |      | ~125.00      |
| Neutrophil percentage                     | 68.7    |                    |      | 40.00-75.00  |
| Lymphocyte percentage                     | 0.8     |                    | ↓    | 20.00-50.00  |
| Monocyte percentage                       | 10.6    |                    | ↑    | 3.00-10.00   |
| Eosinophil percentage                     | 0.5     |                    |      | 0.40-8.00    |
| Basophil absolute count                   | 0.3     |                    |      | 0.00-1.00    |
| Neutrophil count,                         | 2.7     | $\times 10^9/l$    |      | 1.80-6.30    |
| Lymphocyte absolute count                 | 0.8     | $\times 10^9/l$    |      | 1.10-3.20    |
| Monocyte absolute count                   | 0.4     | $\times 10^9/l$    |      | 0.10-0.60    |
| Eosinophil absolute count                 | 0.02    | $\times 10^9/l$    |      | 0.02-0.52    |
| Basophil absolute count                   | 0.01    | $\times 10^9/l$    |      | 0.00-0.06    |
| Hematocrit                                | 37.6    | %                  |      | 40.00-50.00  |
| Mean corpuscular volume                   | 89.1    | fL                 |      | 82.00-100.00 |
| Mean corpuscular hemoglobin               | 31.8    | pg                 |      | 27.00-34.00  |
| Mean corpuscular hemoglobin concentration | 356     | g/l                | ↑    | ~316.00      |
| Red cell distribution width               | 39.7    | fL                 |      | 37.00-50.00  |
| Mean platelet volume                      | 10.1    | fL                 |      | 9.00-13.00   |
| Platelet distribution width               | 10.9    | fL                 |      | 9.00-17.00   |
| Platelet large cell ratio                 | 25.5    | %                  |      | 13.00-43.00  |

Table III. Blood routine examination in Stage 2.

| Blood test                                | Results | Unit               | Mark | Normal range |
|-------------------------------------------|---------|--------------------|------|--------------|
| White blood cell count                    | 3.19    | $\times 10^9/l$    | ↓    | 3.50-9.50    |
| Red blood cell count                      | 4.47    | $\times 10^{12}/l$ |      | 4.30-5.80    |
| Hemoglobin                                | 145.00  | g/l                |      | ~130.00      |
| Platelet count,                           | 250.00  | $\times 10^9/l$    |      | ~125.00      |
| Neutrophil percentage                     | 52.40   | %                  |      | 40.00-75.00  |
| Lymphocyte percentage                     | 34.20   | %                  |      | 20.00-50.00  |
| Monocyte percentage                       | 12.20   | %                  | ↓    | 3.00-10.00   |
| Eosinophil percentage                     | 0.90    | %                  |      | 0.40-8.00    |
| Basophil absolute count                   | 0.30    | %                  |      | 0.00-1.00    |
| Neutrophil count,                         | 1.67    | $\times 10^9/l$    | ↓    | 1.80-6.30    |
| Lymphocyte absolute count                 | 1.09    | $\times 10^9/l$    | ↓    | 1.10-3.20    |
| High-sensitivity C-reactive protein       | < 0.5   | mg/l               |      | 0.00-10.00   |
| Monocyte absolute count                   | 0.39    | $\times 10^9/l$    |      | 0.10-0.60    |
| Eosinophil absolute count                 | 0.03    | $\times 10^9/l$    |      | 0.02-0.52    |
| Basophil absolute count                   | 0.01    | $\times 10^9/l$    |      | 0.02-0.06    |
| Hematocrit                                | 41.00   | %                  |      | 40.00-50.00  |
| Mean corpuscular volume                   | 91.70   | fL                 |      | 82.00-100.00 |
| Mean corpuscular hemoglobin               | 32.40   | pg                 |      | 27.00-34.00  |
| Mean corpuscular hemoglobin concentration | 354.00  | g/l                |      | ~316.00      |
| Red cell distribution width               | 40.70   | fL                 |      | 37.00-50.00  |
| Mean platelet volume                      | 9.20    | fL                 |      | 9.00-13.00   |
| Thrombocytocrit                           | 0.23    |                    |      | 0.09-0.24    |
| Platelet distribution width               | 9.30    | fL                 |      | 9.00-17.00   |
| Platelet large cell ratio                 | 17.50   | %                  |      | 13.00-43.00  |
| Red cell distribution width               | 12.20   | %                  |      | 10.90-16.40  |
| Nucleated red blood cells                 | 0.00    | $\times 10^9/l$    |      |              |
| Nucleated red blood cells                 | 0.00    | /100WBC            |      |              |
